# Supplementary material
Source: publisher figshare collection journal article supplement (https://tandf.figshare.com/ndownloader/files/14887460)
Supplement: Supplementary file 1 [file 14887460]

# The Scaled Uniform Model Revisited

## Supplementary Online Materials

Micha Mandel

The Hebrew University of Jerusalem, Jerusalem, Israel

March 19, 2019

This document provides a simple proof for Proposition 1. The result is a direct corollary of Equations (9) and (10) of Kagan and Malinovsky (2013). However, the following constructive proof explains why this happens.

**Proposition 1.** *Suppose that  $(T(X), A(X))$  is a minimal sufficient statistic for  $\theta$  and that  $A(X)$  is ancillary. Let  $\hat{\theta}$  be an estimator and  $\theta_0$  be a value in the parameter space  $\Theta$  such that (i)  $E_{\theta_0}(\hat{\theta} \mid A) = \theta_0$  almost surely, (ii)  $\text{Var}_{\theta_0}(\hat{\theta}) < \infty$ , and (iii)  $\text{Var}_{\theta_0}(\hat{\theta} \mid A)$  is non-degenerate. Then  $\hat{\theta}$  is not a global UMVUE.*

**Proof.** Suppose that  $A$  is ancillary with density  $f_A$  and that  $E_{\theta_0}(\hat{\theta} \mid A) = \theta_0$  almost surely. Let  $\hat{\theta}_c = c(A)\hat{\theta}$  be a new estimator, where  $c(A)$  satisfies  $E\{c(A)\} = 1$  and  $E\{c^2(A)\} < \infty$ . Then

$$E_{\theta_0}(\hat{\theta}_c) = E_{\theta_0}\{c(A)E_{\theta_0}(\hat{\theta} \mid A)\} = E_{\theta_0}\{c(A)\theta_0\} = \theta_0, \quad (1)$$

having variance

$$\begin{aligned}\text{Var}_{\theta_0}(\hat{\theta}_c) &= E_{\theta_0}\{\text{Var}_{\theta_0}(\hat{\theta}_c \mid A)\} + \text{Var}_{\theta_0}\{E_{\theta_0}(\hat{\theta}_c \mid A)\} \\ &= E_{\theta_0}\{c(A)^2 \text{Var}_{\theta_0}(\hat{\theta} \mid A)\} + \theta_0^2 \text{Var}\{c(A)\}.\end{aligned}\quad (2)$$

It then follows that

$$\text{Var}_{\theta_0}(\hat{\theta}_c) - \text{Var}_{\theta_0}(\hat{\theta}) = E_{\theta_0}[\{c(A)^2 - 1\} \text{Var}_{\theta_0}(\hat{\theta} \mid A)] + \theta_0^2 \text{Var}\{c(A)\}. \quad (3)$$

If  $\text{Var}_{\theta_0}(\hat{\theta} \mid A)$  is non-degenerate, there exist constants  $v_1 < v_2$  and non-null events  $\mathcal{A}_1$  and  $\mathcal{A}_2$  such that  $\text{Var}_{\theta_0}(\hat{\theta} \mid A) < v_1$  on  $\mathcal{A}_1$  and  $\text{Var}_{\theta_0}(\hat{\theta} \mid A) > v_2$  on  $\mathcal{A}_2$ . For any  $\epsilon > 0$  consider the estimator  $\hat{\theta}_{c_\epsilon}$ , where

$$c_\epsilon(A) = \begin{cases} 1 + \epsilon/P(\mathcal{A}_1) & \text{on } \mathcal{A}_1 \\ 1 - \epsilon/P(\mathcal{A}_2) & \text{on } \mathcal{A}_2 \\ 1 & \text{on } \overline{\mathcal{A}_1 \cup \mathcal{A}_2} \end{cases}$$

Write  $V_a = \text{Var}_{\theta_0}(\hat{\theta} \mid A = a)$ . For  $c = c_\epsilon$ , the first term on the right-hand side of (3) becomes

$$\begin{aligned}& \int_{\mathcal{A}_1} \{\epsilon^2/P^2(\mathcal{A}_1) + 2\epsilon/P(\mathcal{A}_1)\} V_a f_A(a) da + \int_{\mathcal{A}_2} \{\epsilon^2/P^2(\mathcal{A}_2) - 2\epsilon/P(\mathcal{A}_2)\} V_a f_A(a) da \\ & < \{\epsilon^2/P^2(\mathcal{A}_1) + \epsilon^2/P^2(\mathcal{A}_2)\} \text{Var}_{\theta_0}(\hat{\theta}) + 2\epsilon(v_1 - v_2),\end{aligned}$$

where the inequality follows from the definition of  $v_1$  and  $v_2$  and the fact that  $\text{Var}_{\theta_0}(\hat{\theta}) = \int_{\mathbb{R}} V_a f_A(a) da \geq \int_{\mathcal{A}_k} V_a f_A(a) da$  for  $k = 1, 2$ . The second term on the right-hand side of (3) is readily calculated as

$$\theta_0^2 \{\epsilon^2/P(\mathcal{A}_1) + \epsilon^2/P(\mathcal{A}_2)\},$$

so the difference of variances is bounded by

$$\text{Var}_{\theta_0}(\hat{\theta}_{c_\epsilon}) - \text{Var}_{\theta_0}(\hat{\theta}) < \epsilon^2 \left[ \frac{\text{Var}_{\theta_0}(\hat{\theta}) + \theta_0^2 P(\mathcal{A}_1)}{P^2(\mathcal{A}_1)} + \frac{\text{Var}_{\theta_0}(\hat{\theta}) + \theta_0^2 P(\mathcal{A}_2)}{P^2(\mathcal{A}_2)} \right] + 2\epsilon(v_1 - v_2). \quad (4)$$

Since  $v_1 - v_2 < 0$  and  $\text{Var}_{\theta_0}(\hat{\theta}) < \infty$ , Equation (4) shows that there is a small enough  $\epsilon$  such that  $\text{Var}_{\theta_0}(\hat{\theta}_{c_\epsilon}) - \text{Var}_{\theta_0}(\hat{\theta}) < 0$ , and thus  $\hat{\theta}$  cannot be a UMVUE. Therefore, a necessary condition for a conditional unbiased estimator to be a global UMVUE is that, for all  $\theta \in \Theta$ ,  $\text{Var}(\hat{\theta} \mid A)$  be almost surely constant.

## References

- [1] Kagan, A. M., and Malinovsky, Y. (2013), “On the Nile problem by Sir Ronald Fisher,” *Electronic Journal of Statistics*, 7, 1968-1982.
